# Supplementary material
Source: ML conference proceedings conference paper supplement (https://openaccess.thecvf.com/content/CVPR2023/html/He_Few-Shot_Geometry-Aware_Keypoint_CVPR_2023_paper.html)
Supplement: Supplementary file 1 [file He_Few-Shot_Geometry-Aware_Keypoint_CVPR_2023_supplemental.zip]

Archive with 2 entries (2 files):
- CVPR2023_FewShotGeometryAwareKeypointLocalization-SupplementaryDocument.pdf
- FewShotGeometryAwareKeypointLocalization-SupplementaryVideo_LowRes.mp4
